# Supplementary material for: An Evaluation of a Web-Based Decision Aid for Treatment Planning of Small Kidney Tumors: Pilot Randomized Controlled Trial
Source: PubMed Central journal article supplement (PMC9482069; doi:10.2196/41451), 2022-09-02
Supplement: resprot_v11i9e41451_app1.pdf [file resprot_v11i9e41451_app1.pdf]

### Tool for Assessing Patient Knowledge about SKMs

1. Do most small kidney masses tend to grow rapidly or quickly?
  - a. Rapidly
  - b. Slowly
  - c. Don't know
  
2. For small kidney masses, how does having a mass near the center of the kidney affect the kind of treatment recommended?
  - a. Worse chance of successful treatment with removal of the entire kidney
  - b. Equal chance of successful treatment with any option
  - c. Better chance of successful treatment with removal of the entire kidney
  - d. Don't know
  
3. In patients with kidney masses, does a larger size mean that they will have a worse, equal, or better chance that the treatment would be successful?
  - a. Worse chance
  - b. Equal chance
  - c. Better chance
  - d. Don't know
  
4. Without treatment, about how many patients with small kidney masses will eventually die of kidney cancer?
  - a. Most will die of kidney cancer
  - b. Half would die of kidney cancer
  - c. Most will die of some other cause
  - d. Don't know
  
5. For most patients with an early stage kidney cancer, how much would waiting 6-12 months to make a treatment decision affect their chances of survival?
  - a. A lot
  - b. Somewhat
  - c. A little or not at all
  - d. Don't know
  
6. Which of the following are good reasons for a patient with a small kidney mass to consider NOT having treatment right away?
  - a. To avoid or delay the possible side effects of these treatments
  - b. To make sure these treatments are really needed
  - c. Both to avoid or delay the possible side effects of these treatments and to make sure these treatments are really needed
  - d. Don't know

7. Of the following treatments for small kidney masses, which can cause problems with how well the kidney functions?

Surgery:

- a. Yes
- b. No
- c. Don't know

Ablation:

- a. Yes
- b. No
- c. Don't know

No Active Treatment Right Away:

- a. Yes
- b. No
- c. Don't know

8. How does chronic kidney disease affect how long a patient will live, also called life expectancy?

- a. Shorter life expectancy
- b. Equal life expectancy
- c. Better life expectancy
- d. Don't know
